# Supplementary material for: Reduced Let-7f in Bone Marrow-Derived Mesenchymal Stem Cells Triggers Treg/Th17 Imbalance in Patients With Systemic Lupus Erythematosus
Source: PubMed Central journal article supplement (PMC7040072; doi:10.3389/fimmu.2020.00233), 2020-02-18
Supplement: Presentation_1.pdf [file Presentation_1.pdf]

**Supplementary table 1.** Demographic and clinical characteristics of SLE patients.

| No./Age/<br>Sex | Disease<br>duration<br>,<br>months | SLED<br>AI<br>score | Proteinuria<br>(mg/24h) | Cr( $\mu$ mol/L) | Clinical manifestations                                                       | Treatment                    |
|-----------------|------------------------------------|---------------------|-------------------------|------------------|-------------------------------------------------------------------------------|------------------------------|
| SLE1/34/F       | 24                                 | 6.0                 | 580                     | 80.6             | Nephritis,<br>polyserositis, cytopenia.                                       | Pred, HCQ, MMF.              |
| SLE2/22/F       | 12                                 | 16.0                | 2650                    | 239.5            | Nephritis, polyserositis,<br>arthralgia, cytopenia, skin<br>vasculitis.       | Pred, CTX, HCQ, LEF.         |
| SLE3/38/F       | 64                                 | 8.0                 | 643                     | 83.8             | Nephritis,<br>cytopenia, skin vasculitis                                      | Pred, CTX, HCQ,<br>Cellcept. |
| SLE4/42/F       | 108                                | 10.0                | 3580                    | 148.2            | Nephritis, polyserositis,<br>arthralgia, cytopenia,                           | Pred, AZA, CTX, IVIG.        |
| SLE5/32/F       | 120                                | 9.0                 | 1748                    | 120.8            | Nephritis, arthralgia,<br>Cytopenia                                           | CTX, LEF.                    |
| SLE6/37/F       | 84                                 | 13.0                | 1280                    | 66.4             | Nephritis,<br>cytopenia, skin vasculitis,<br>Neuropsychiatric<br>involvement. | Pred, CTX.                   |
| SLE7/40/F       | 60                                 | 6.0                 | 420                     | 48.0             | Arthralgia,<br>cytopenia, skin vasculitis                                     | Pred, HCQ, MMF.              |
| SLE8/42/F       | 184                                | 7.0                 | -                       | 91.6             | Cytopenia, skin vasculitis.                                                   | Pred, AZA, HCQ.              |
| SLE9/28/F       | 122                                | 10.0                | 1200                    | 78.2             | Nephritis, arthralgia,<br>cytopenia, skin vasculitis.                         | Pred, CTX, HCQ.              |
| SLE10/23/F      | 4                                  | 2                   | -                       | 32               | Cytopenia, skin vasculitis.                                                   | CTX.                         |
| SLE11/35/F      | 36                                 | 1                   | -                       | 43               | Cytopenia.                                                                    | CTX, HCQ.                    |
| SLE12/27/F      | 10 day                             | 2                   | -                       | 25               | Cytopenia, skin vasculitis.                                                   | -                            |
| SLE13/33/F      | 132                                | 2                   | -                       | 19               | Arthralgia, cytopenia.                                                        | Pred, CTX, Cellcept.         |
| SLE14/35/F      | 3                                  | 1                   | -                       | 48               | Cytopenia.                                                                    | HCQ.                         |
| SLE15/46/F      | 192                                | 3                   | -                       | 67               | Arthralgia, cytopenia,<br>skin vasculitis                                     | Pred, MTX, HCQ.              |

SLE: systemic lupus erythematosus; SLEDAI: SLE disease activity index; Cr: creatinine; F: female; Pred, Prednisone; CTX, cyclophosphamide; HCQ, hydroxychloroquine; MTX, methotrexate; MMF, mycophenolate mofetil; AZA, azathioprine; LEF, leflunomide.

**Supplementary table 2.** Demographic and clinical characteristics of pSS patients.

| No./Age/<br>Sex | Disease<br>duration,<br>months | SSDAI<br>score | Clinical manifestations              | Drug treatment     |
|-----------------|--------------------------------|----------------|--------------------------------------|--------------------|
| pSS1/38/F       | 14                             | 3.0            | Cytopenia.                           | Pred, HCQ.         |
| pSS2/51/F       | 72                             | 8.0            | Arthralgia, cytopenia.               | Pred, NSAIDs, HCQ. |
| pSS3/39/F       | 60                             | 9.0            | Renal involvement                    | Pred, MMF.         |
| pSS4/51/F       | 188                            | 10.0           | Arthralgia, fever.                   | Pred, MTX, HCQ.    |
| pSS5/28/F       | 4                              | 6.0            | Cytopenia, interstitial pneumonitis. | Pred, AZA, HCQ.    |
| pSS6/45/F       | 10                             | 8.0            | Arthralgia, Cytopenia.               | Pred, MTX, HCQ.    |
| pSS7/43/F       | 12                             | 9.0            | Arthralgia, Cytopenia.               | Pred, LEF, HCQ.    |
| pSS8/33/F       | 6                              | 5.0            | Cytopenia.                           | Pred, HCQ.         |

SS: primary Sjögren's syndrome; SSDAI: SS disease activity index; F: female. Pred, Prednisone; HCQ, hydroxychloroquine; MTX, methotrexate; MMF, mycophenolate mofetil; AZA, azathioprine; LEF, leflunomide; NSAIDs, nonsteroidal anti-inflammatory drugs.

**Supplementary table 3.** Demographic and clinical characteristics of RA and UCTD patients.

| No./Age/<br>Sex | Disease<br>duration,<br>months | Clinical manifestations                  | Treatment               |
|-----------------|--------------------------------|------------------------------------------|-------------------------|
| RA1/45/F        | 24                             | Arthralgia, interstitial<br>pneumonitis. | Pred, triptolide.       |
| RA2/41/F        | 12                             | Arthralgia.                              | Pred, MTX.              |
| RA3/39/F        | 60                             | Arthralgia.                              | NSAIDs, MTX.            |
| RA4/52/F        | 18                             | Arthralgia.                              | Pred, LEF.              |
| RA5/32/F        | 64                             | Fever.                                   | Pred, MTX.              |
| UCTD1/27/F      | 32                             | Cytopenia, interstitial<br>pneumonitis.  | Pred, triptolide, HCQ.  |
| UCTD2/32/F      | 38                             | Arthralgia, skin vasculitis.             | Pred, MTX, thalidomide. |
| UCTD3/39/F      | 42                             | Cytopenia, skin vasculitis.              | Pred, AZA, thalidomide. |
| UCTD4/33/F      | 45                             | Arthralgia, interstitial<br>pneumonitis. | Pred, triptolide.       |

RA: Rheumatoid arthritis; UCTD, Undifferentiated connective tissue disease; F: female. Pred, Prednisone; CTX, cyclophosphamide; HCQ, hydroxychloroquine; MTX, methotrexate; MMF, mycophenolate mofetil; AZA, azathioprine; LEF, leflunomide; NSAIDs, nonsteroidal anti-inflammatory drugs.

**Supplementary table 4.** Correlation between expression levels of 6 abnormally expressed miRNAs and clinical characteristics of SLE patients.

| Clinical<br>characteristics | r vs<br>p | miR-663 | miR-214 | miR-574-3p | miR-638 | let-7f | miR-374a |
|-----------------------------|-----------|---------|---------|------------|---------|--------|----------|
|                             |           | SLEDAI  | r       | 0.71       | 0.34    | 0.38   | 0.75     |
|                             | p         | 0.03    | 0.21    | 0.09       | 0.12    | 0.03   | 0.13     |
| Age                         | r         | 0.22    | 0.04    | -0.02      | 0.15    | 0.28   | -0.16    |
|                             | p         | 0.58    | 0.89    | 0.78       | 0.49    | 0.47   | 0.51     |
| Duration of<br>disease      | r         | 0.02    | 0.03    | 0.06       | 0.26    | 0.02   | -0.45    |
|                             | p         | 0.97    | 0.94    | 0.70       | 0.88    | 0.95   | 0.74     |
| C3                          | r         | -0.68   | -0.14   | 0.25       | 0.55    | 0.44   | -0.32    |
|                             | p         | 0.045   | 0.60    | 0.66       | 0.12    | 0.24   | 0.16     |
| C4                          | r         | -0.55   | 0.03    | -0.15      | 0.36    | -0.03  | -0.29    |

|             |   |      |      |       |      |       |       |
|-------------|---|------|------|-------|------|-------|-------|
|             | p | 0.13 | 0.91 | 0.58  | 0.35 | 0.95  | 0.42  |
| 24h         | r | 0.17 | 0.03 | 0.39  | 0.30 | -0.67 | 0.59  |
| proteinuria | p | 0.65 | 0.67 | 0.38  | 0.17 | 0.047 | 0.08  |
| Cr          | r | 0.54 | 0.05 | 0.19  | 0.26 | -0.12 | 0.28  |
|             | p | 0.14 | 0.76 | 0.45  | 0.20 | 0.62  | 0.63  |
| BUN         | r | 0.59 | 0.05 | 0.19  | 0.14 | -0.07 | -0.1  |
|             | p | 0.09 | 0.84 | 0.36  | 0.52 | 0.83  | 0.61  |
| UA          | r | 0.12 | 0.14 | -0.21 | 0.83 | 0.10  | 0.55  |
|             | p | 0.67 | 0.59 | 0.32  | 0.24 | 0.56  | 0.08  |
| GFR         | r | 0.23 | 0.09 | 0.18  | 0.13 | -0.23 | -0.36 |
|             | p | 0.47 | 0.76 | 0.34  | 0.42 | 0.85  | 0.10  |
| CRP         | r | 0.75 | 0.06 | 0.36  | 0.67 | -0.43 | -0.39 |
|             | p | 0.02 | 0.75 | 0.07  | 0.05 | 0.26  | 0.33  |
| ESR         | r | 0.27 | 0.16 | 0.31  | 0.21 | -0.66 | 0.09  |
|             | p | 0.16 | 0.42 | 0.14  | 0.21 | 0.047 | 0.60  |
| WBC         | r | 0.20 | 0.14 | 0.16  | 0.55 | 0.12  | -0.15 |
|             | p | 0.13 | 0.49 | 0.62  | 0.74 | 0.67  | 0.65  |
| HB          | r | 0.34 | 0.15 | 0.22  | 0.38 | -0.02 | -0.09 |
|             | p | 0.30 | 0.45 | 0.22  | 0.05 | 0.43  | 0.92  |
| PLT         | r | 0.45 | 0.02 | 0.09  | 0.04 | 0.71  | 0.34  |
|             | p | 0.09 | 0.92 | 0.68  | 0.86 | 0.03  | 0.24  |

The r and p values of nonparametric analysis are listed. SLEDAI: SLE disease activity index; yrs: years; C3: complement 3; C4: complement 4; 24h proteinuria:24-hour proteinuria; Cr: creatinine; BUN: urea nitrogen; UA: uric acid; GFR: glomerular filtration rate; CRP: C-reactive protein; ESR: erythrocyte sedimentation rate; WBC: white blood cells; HB: hemoglobin; PLT: platelet.
