# Supplementary material for: Reduced Let-7f in Bone Marrow-Derived Mesenchymal Stem Cells Triggers Treg/Th17 Imbalance in Patients With Systemic Lupus Erythematosus
Source: PubMed Central journal article supplement (PMC7040072; doi:10.3389/fimmu.2020.00233), 2020-02-18
Supplement: Presentation_2.pdf [file Presentation_2.pdf]

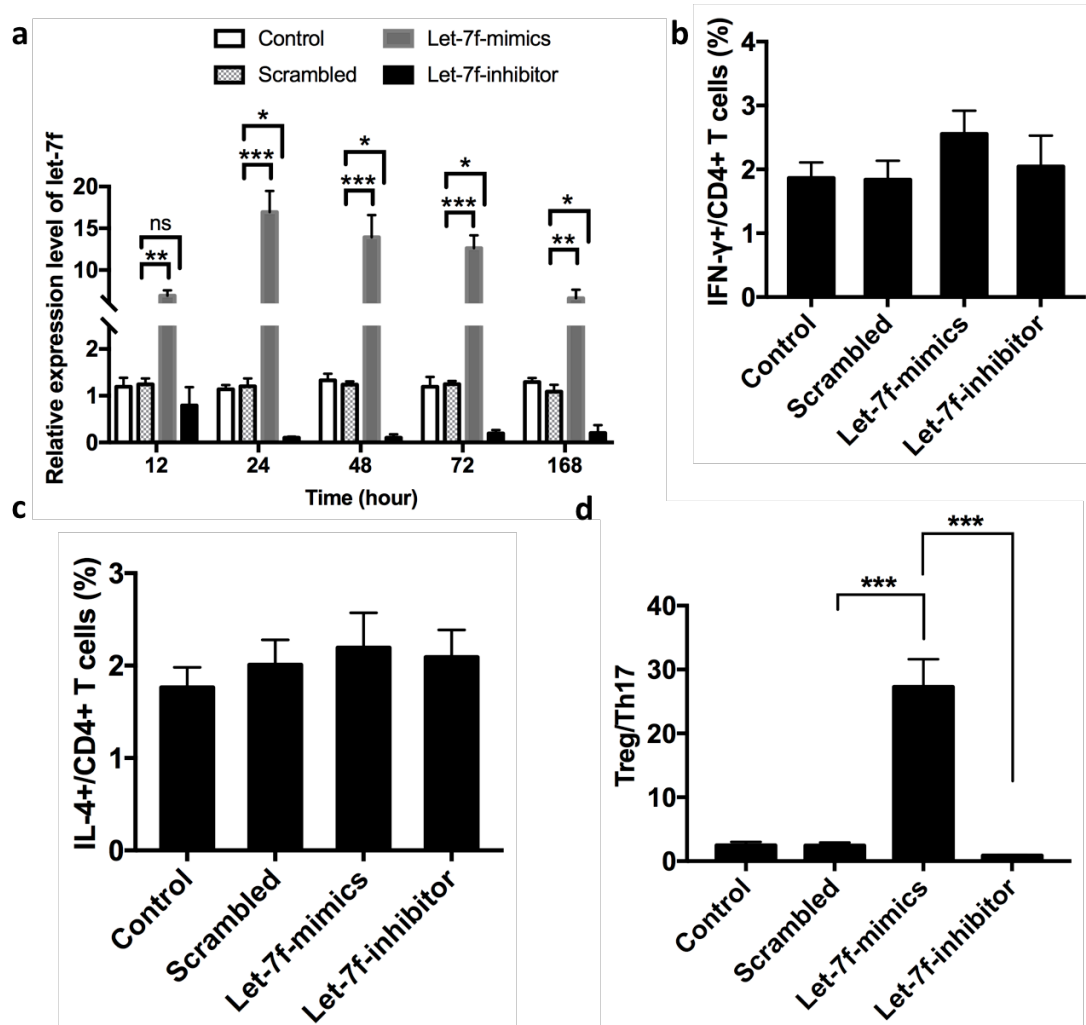

**Supplementary figure 1.** The role of let-7f in BM-MSCs from healthy subjects. (a) Expression levels of let-7f at 12, 24, 48, 72 and 168 hours in let-7 related oligonucleotide transfected BM-MSCs. (b-c) Proportions of Th1 cells (b, IFN- $\gamma$ <sup>+</sup>/CD4<sup>+</sup> T cells) and Th2 cells (c, IL-4<sup>+</sup>/CD4<sup>+</sup> T cells) after co-culturing of pre-stimulated PBMCs with let-7f-related BM-MSCs. (d) The ratio of Treg (CD25<sup>+</sup>Foxp3<sup>+</sup>/CD4<sup>+</sup> T cells) to Th17 (IL-17A<sup>+</sup>/CD4<sup>+</sup> T cells) after co-culturing of pre-stimulated naïve T cells with let-7f-related BM-MSCs. All data are means  $\pm$  SEM. n=6. \* $p$  < 0.05, \*\* $p$  < 0.01, \*\*\* $p$  < 0.001.

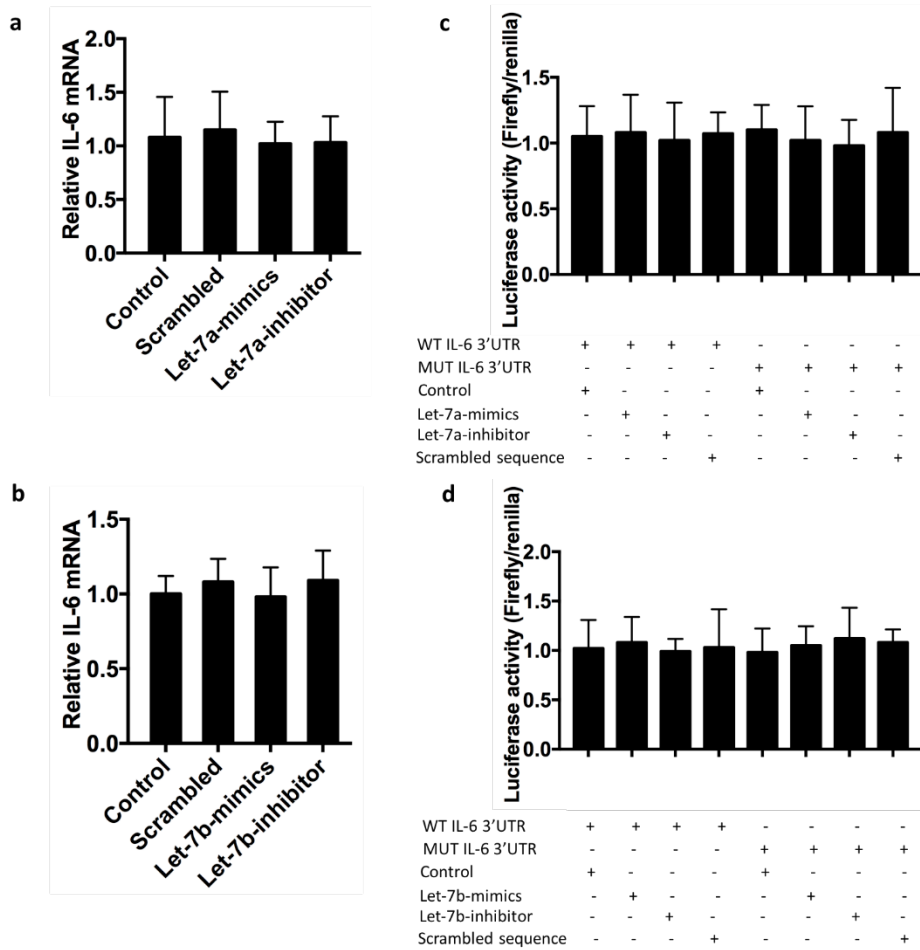

**Supplementary figure 2.** (a, b) IL-6 mRNA levels in various let-7a (a) or let-7b (b) related BMSCs. (c, d) The IL-6 3'-UTR is not involved in let-7a (c) and let-7b (d) regulated gene expression. All data represent the mean  $\pm$  SEM. n = 6, \*P<0.05, \*\*P<0.01, \*\*\*P<0.001.

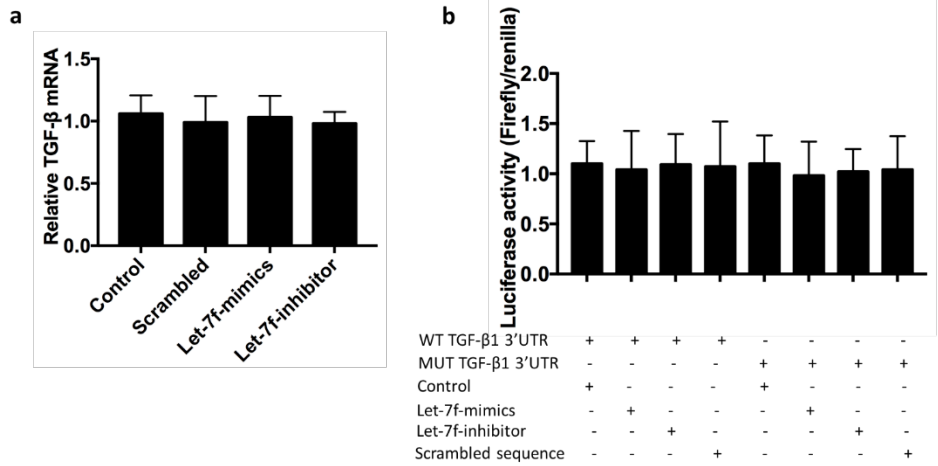

**Supplementary figure 3.** (a) TGF-β mRNA levels in various ectopic let-7f oligonucleotide sequence transfected BM-MSCs. (c, d) The TGF-β 3'-UTR is not involved in let-7f regulated gene expression. All data represent the mean ± SEM. n = 6.
